# Supplementary material for: A Comparison of Depression and Anxiety among University Students in Nine Countries during the COVID-19 Pandemic
Source: MDPI journal article supplement (doi:10.3390/jcm10132882), 2021-06-29
Supplement: s1 [file s1]

## Supplementary Materials

**Table S1.** Association between depression risk and other variables among university students from Colombia, Czechia, Germany, Israel, Poland, Russia, Slovenia, Turkey, and Ukraine during the first wave of the COVID-19 pandemic

| Variable                       | Depression              |              |                           |              |                           |              |                           |              |                           |              |                           |              |                           |              |                           |              |                           |              |
|--------------------------------|-------------------------|--------------|---------------------------|--------------|---------------------------|--------------|---------------------------|--------------|---------------------------|--------------|---------------------------|--------------|---------------------------|--------------|---------------------------|--------------|---------------------------|--------------|
|                                | Colombia<br>(n = 155)   |              | Czechia<br>(n = 310)      |              | Germany<br>(n = 270)      |              | Israel<br>(n = 199)       |              | Poland<br>(n = 301)       |              | Russia<br>(n = 285)       |              | Slovenia<br>(n = 209)     |              | Turkey<br>(n = 310)       |              | Ukraine<br>(n = 310)      |              |
|                                | No risk<br>n(%)         | Risk<br>n(%) | No risk<br>n(%)           | Risk<br>n(%) | No risk<br>n(%)           | Risk<br>n(%) | No risk<br>n(%)           | Risk<br>n(%) | No risk<br>n(%)           | Risk<br>n(%) | No risk<br>n(%)           | Risk<br>n(%) | No risk<br>n(%)           | Risk<br>n(%) | No risk<br>n(%)           | Risk<br>n(%) | No risk<br>n(%)           | Risk<br>n(%) |
| Gender                         | $\chi^2(1) = 4.44^*$    |              | $\chi^2(1) = 0.17$        |              | $\chi^2(1) = 0.18$        |              | $\chi^2(1) = 1.85$        |              | $\chi^2(1) = 7.28^{**}$   |              | $\chi^2(1) = 10.24^{**}$  |              | $\chi^2(1) = 0.96$        |              | $\chi^2(1) = 15.40^{***}$ |              | $\chi^2(1) = 9.02^{**}$   |              |
| Men                            | 32(62)                  | 20(38)       | 81(78)                    | 23(22)       | 45(60)                    | 30(40)       | 33(66)                    | 17(34)       | 51(64)                    | 29(36)       | 67(73)                    | 25(27)       | 23(74)                    | 8(26)        | 66(50)                    | 67(50)       | 77(83)                    | 16(17)       |
| Women                          | 44(44)                  | 57(56)       | 163(80)                   | 41(20)       | 120(63)                   | 71(37)       | 82(55)                    | 67(45)       | 102(46)                   | 119(54)      | 101(53)                   | 90(47)       | 116(65)                   | 62(35)       | 48(28)                    | 125(72)      | 143(66)                   | 74(34)       |
| Place of Residence             | $\chi^2(1) = 0.40$      |              | $\chi^2(1) = 0.92$        |              | $\chi^2(1) = 0.00$        |              | $\chi^2(1) = 0.49$        |              | $\chi^2(1) = 0.31$        |              | $\chi^2(1) = 0.32$        |              | $\chi^2(1) = 0.24$        |              | $\chi^2(1) = 0.91$        |              | $\chi^2(1) = 0.63$        |              |
| Village/Town                   | 0(0)                    | 0(0)         | 175(78)                   | 49(22)       | 143(63)                   | 84(37)       | 22(58)                    | 16(42)       | 117(50)                   | 118(50)      | 54(61)                    | 34(39)       | 98(65)                    | 52(35)       | 37(40)                    | 56(60)       | 157(69)                   | 69(31)       |
| City                           | 76(50)                  | 77(50)       | 70(81)                    | 16(19)       | 22(55)                    | 18(45)       | 93(58)                    | 68(42)       | 36(55)                    | 30(45)       | 114(58)                   | 83(42)       | 41(69)                    | 18(31)       | 80(37)                    | 137(63)      | 63(75)                    | 21(25)       |
| Level of Study                 | $\chi^2(1) = 4.16^*$    |              | $\chi^2(1) = 5.71^*$      |              | $\chi^2(1) = 0.04$        |              | $\chi^2(1) = 0.10$        |              | $\chi^2(1) = 0.83$        |              | $\chi^2(1) = 0.04$        |              | $\chi^2(1) = 8.24^{**}$   |              | $\chi^2(1) = 1.36$        |              | $\chi^2(1) = 0.63$        |              |
| Bachelor                       | 78(52)                  | 73(48)       | 171(76)                   | 55(24)       | 82(61)                    | 52(39)       | 113(58)                   | 83(42)       | 83(49)                    | 88(51)       | 145(59)                   | 100(41)      | 86(60)                    | 57(40)       | 104(37)                   | 179(63)      | 205(70)                   | 86(30)       |
| Master                         | 0(0)                    | 4(100)       | 74(88)                    | 10(12)       | 83(62)                    | 50(38)       | 2(67)                     | 1(33)        | 70(54)                    | 60(46)       | 23(58)                    | 17(42)       | 53(80)                    | 13(20)       | 13(48)                    | 14(52)       | 15(79)                    | 4(21)        |
| Exposure to COVID-19           | $\chi^2(1) = 3.73^*$    |              | $\chi^2(1) = 11.44^{***}$ |              | $\chi^2(1) = 4.16^*$      |              | $\chi^2(1) = 15.99^{***}$ |              | $\chi^2(1) = 7.60^{**}$   |              | $\chi^2(1) = 10.39^{**}$  |              | $\chi^2(1) = 23.01^{***}$ |              | $\chi^2(1) = 3.55$        |              | $\chi^2(1) = 6.65^{**}$   |              |
| Lower                          | 17(68)                  | 8(32)        | 155(86)                   | 26(14)       | 69(70)                    | 30(30)       | 50(78)                    | 14(22)       | 56(63)                    | 33(37)       | 56(75)                    | 19(25)       | 67(87)                    | 10(13)       | 29(48)                    | 31(52)       | 53(84)                    | 10(16)       |
| Higher                         | 61(47)                  | 69(53)       | 90(70)                    | 39(30)       | 96(57)                    | 72(43)       | 65(48)                    | 70(52)       | 96(45)                    | 115(55)      | 112(53)                   | 98(47)       | 72(55)                    | 60(45)       | 88(35)                    | 162(65)      | 167(68)                   | 80(32)       |
| Impact COVID-19: Total         | $\chi^2(1) = 2.28$      |              | $\chi^2(1) = 16.10^{***}$ |              | $\chi^2(1) = 39.80^{***}$ |              | $\chi^2(1) = 35.64^{***}$ |              | $\chi^2(1) = 20.85^{***}$ |              | $\chi^2(1) = 19.72^{***}$ |              | $\chi^2(1) = 33.96^{***}$ |              | $\chi^2(1) = 9.26^{**}$   |              | $\chi^2(1) = 13.01^{***}$ |              |
| Lower                          | 21(62)                  | 13(38)       | 158(87)                   | 24(13)       | 124(77)                   | 37(23)       | 87(76)                    | 28(24)       | 57(73)                    | 21(27)       | 108(71)                   | 44(29)       | 102(82)                   | 22(18)       | 39(53)                    | 35(47)       | 118(81)                   | 28(19)       |
| Higher                         | 57(47)                  | 64(53)       | 87(68)                    | 41(32)       | 41(39)                    | 65(61)       | 28(33)                    | 56(67)       | 96(43)                    | 127(57)      | 60(45)                    | 73(55)       | 37(44)                    | 48(56)       | 78(33)                    | 158(67)      | 102(62)                   | 62(38)       |
| Impact COVID-19: Graduation    | $\chi^2(1) = 3.94^*$    |              | $\chi^2(1) = 2.64$        |              | $\chi^2(1) = 16.95^{***}$ |              | $\chi^2(1) = 12.94^{***}$ |              | $\chi^2(1) = 3.43$        |              | $\chi^2(1) = 15.66^{***}$ |              | $\chi^2(1) = 32.67^{***}$ |              | $\chi^2(1) = 6.09^*$      |              | $\chi^2(1) = 4.96^*$      |              |
| Lower                          | 32(62)                  | 20(38)       | 137(83)                   | 29(17)       | 101(74)                   | 36(26)       | 68(71)                    | 28(29)       | 44(60)                    | 29(40)       | 93(72)                    | 37(28)       | 88(85)                    | 15(15)       | 50(47)                    | 56(53)       | 96(78)                    | 27(22)       |
| Higher                         | 46(45)                  | 57(55)       | 108(75)                   | 36(25)       | 64(49)                    | 66(51)       | 47(46)                    | 56(54)       | 109(48)                   | 119(52)      | 75(48)                    | 80(52)       | 51(48)                    | 55(52)       | 67(33)                    | 137(67)      | 124(66)                   | 63(34)       |
| Impact COVID-19: Financing     | $\chi^2(1) = 5.06^*$    |              | $\chi^2(1) = 8.46^{**}$   |              | $\chi^2(1) = 14.02^{***}$ |              | $\chi^2(1) = 13.12^{***}$ |              | $\chi^2(1) = 2.20$        |              | $\chi^2(1) = 11.25^{***}$ |              | $\chi^2(1) = 10.10^{**}$  |              | $\chi^2(1) = 13.58^{***}$ |              | $\chi^2(1) = 4.65^*$      |              |
| Lower                          | 29(64)                  | 16(36)       | 125(86)                   | 20(14)       | 117(70)                   | 49(30)       | 58(73)                    | 21(27)       | 49(58)                    | 36(42)       | 71(72)                    | 27(28)       | 76(78)                    | 22(22)       | 59(51)                    | 57(49)       | 95(78)                    | 27(22)       |
| Higher                         | 49(45)                  | 61(55)       | 120(73)                   | 45(27)       | 48(48)                    | 53(52)       | 57(48)                    | 63(62)       | 104(48)                   | 112(52)      | 97(52)                    | 90(48)       | 63(57)                    | 48(43)       | 58(30)                    | 136(70)      | 125(66)                   | 63(34)       |
| Impact COVID-19: Relationships | $\chi^2(1) = 1.04$      |              | $\chi^2(1) = 11.06^{***}$ |              | $\chi^2(1) = 9.76^{**}$   |              | $\chi^2(1) = 14.38^{***}$ |              | $\chi^2(1) = 24.57^{***}$ |              | $\chi^2(1) = 24.16^{***}$ |              | $\chi^2(1) = 13.70^{***}$ |              | $\chi^2(1) = 4.26^*$      |              | $\chi^2(1) = 8.36^{**}$   |              |
| Lower                          | 16(59)                  | 11(41)       | 147(86)                   | 24(14)       | 89(72)                    | 35(28)       | 71(71)                    | 29(29)       | 66(73)                    | 25(27)       | 114(72)                   | 45(28)       | 91(77)                    | 27(23)       | 21(53)                    | 19(48)       | 118(79)                   | 32(21)       |
| Higher                         | 62(48)                  | 66(52)       | 98(71)                    | 41(29)       | 76(53)                    | 67(47)       | 44(44)                    | 55(56)       | 87(41)                    | 123(59)      | 54(43)                    | 72(57)       | 48(53)                    | 43(47)       | 96(36)                    | 174(64)      | 102(64)                   | 58(36)       |
| Physical Activity              | $\chi^2(1) = 0.56$      |              | $\chi^2(1) = 1.70$        |              | $\chi^2(1) = 0.03$        |              | $\chi^2(1) = 3.88^*$      |              | $\chi^2(1) = 4.85^*$      |              | $\chi^2(1) = 7.36^{**}$   |              | $\chi^2(1) = 0.44$        |              | $\chi^2(1) = 1.01$        |              | $\chi^2(1) = 11.77^{***}$ |              |
| Sufficient                     | 44(48)                  | 48(52)       | 168(81)                   | 39(19)       | 79(62)                    | 48(38)       | 65(52)                    | 59(48)       | 90(46)                    | 105(54)      | 102(53)                   | 89(47)       | 51(61)                    | 29(36)       | 97(37)                    | 168(63)      | 107(63)                   | 63(37)       |
| Insufficient                   | 34(54)                  | 29(46)       | 77(75)                    | 26(25)       | 85(61)                    | 54(39)       | 50(67)                    | 25(33)       | 63(59)                    | 43(41)       | 66(70)                    | 28(30)       | 88(68)                    | 41(32)       | 20(44)                    | 25(56)       | 113(81)                   | 27(19)       |
| Physical Health                | $\chi^2(1) = 5.14^*$    |              | $\chi^2(1) = 3.44$        |              | $\chi^2(1) = 21.71^{***}$ |              | $\chi^2(1) = 4.88^*$      |              | $\chi^2(1) = 13.14^{***}$ |              | $\chi^2(1) = 9.99^{**}$   |              | $\chi^2(1) = 15.16^{***}$ |              | $\chi^2(1) = 5.89^*$      |              | $\chi^2(1) = 3.60$        |              |
| Better                         | 75(53)                  | 66(47)       | 236(80)                   | 59(20)       | 153(68)                   | 73(32)       | 113(59)                   | 77(41)       | 150(54)                   | 129(46)      | 148(63)                   | 86(37)       | 134(71)                   | 56(29)       | 107(41)                   | 157(59)      | 215(72)                   | 84(28)       |
| Worse                          | 3(21)                   | 11(79)       | 9(60)                     | 6(40)        | 12(29)                    | 29(71)       | 2(22)                     | 7(78)        | 3(14)                     | 19(86)       | 20(39)                    | 31(61)       | 5(26)                     | 14(74)       | 10(22)                    | 36(78)       | 5(45)                     | 6(55)        |
| Physical Health Comparative    | $\chi^2(1) = 6.83^{**}$ |              | $\chi^2(1) = 14.45^{***}$ |              | $\chi^2(1) = 7.09^{**}$   |              | $\chi^2(1) = 5.76^*$      |              | $\chi^2(1) = 21.64^{***}$ |              | $\chi^2(1) = 2.33$        |              | $\chi^2(1) = 20.89^{***}$ |              | $\chi^2(1) = 10.73$       |              | $\chi^2(1) = 6.96^{**}$   |              |
| Better                         | 73(54)                  | 61(46)       | 228(82)                   | 50(18)       | 139(66)                   | 72(34)       | 108(61)                   | 70(39)       | 146(56)                   | 114(44)      | 135(61)                   | 85(39)       | 131(72)                   | 50(28)       | 111(41)                   | 158(59)      | 215(72)                   | 82(28)       |
| Worse                          | 5(24)                   | 16(76)       | 17(53)                    | 15(47)       | 26(46)                    | 30(54)       | 7(33)                     | 14(67)       | 7(17)                     | 34(83)       | 33(51)                    | 32(49)       | 8(29)                     | 20(71)       | 6(15)                     | 35(85)       | 5(38)                     | 8(62)        |

Note. PIC = Perceived Impact of COVID-19 on Students' Well-being; PH = Physical Health.  $^*p < 0.05$ ,  $^{**}p < 0.01$ ,  $^{***}p < 0.001$

**Table S2.** Association between anxiety risk and other variables among university students from Colombia, Czechia, Germany, Israel, Poland, Russia, Slovenia, Turkey, and Ukraine during the first wave of the COVID-19 pandemic

| Variable             | Anxiety                 |              |                         |              |                           |              |                           |              |                           |              |                          |              |                           |              |                           |              |                           |              |
|----------------------|-------------------------|--------------|-------------------------|--------------|---------------------------|--------------|---------------------------|--------------|---------------------------|--------------|--------------------------|--------------|---------------------------|--------------|---------------------------|--------------|---------------------------|--------------|
|                      | Colombia<br>(n = 155)   |              | Czechia<br>(n = 310)    |              | Germany<br>(n = 270)      |              | Israel<br>(n = 199)       |              | Poland<br>(n = 301)       |              | Russia<br>(n = 285)      |              | Slovenia<br>(n = 209)     |              | Turkey<br>(n = 310)       |              | Ukraine<br>(n = 310)      |              |
|                      | No risk<br>n(%)         | Risk<br>n(%) | No risk<br>n(%)         | Risk<br>n(%) | No risk<br>n(%)           | Risk<br>n(%) | No risk<br>n(%)           | Risk<br>n(%) | No risk<br>n(%)           | Risk<br>n(%) | No risk<br>n(%)          | Risk<br>n(%) | No risk<br>n(%)           | Risk<br>n(%) | No risk<br>n(%)           | Risk<br>n(%) | No risk<br>n(%)           | Risk<br>n(%) |
| Gender               | $\chi^2(1) = 3.55$      |              | $\chi^2(1) = 3.55$      |              | $\chi^2(1) = 1.37$        |              | $\chi^2(1) = 4.87^*$      |              | $\chi^2(1) = 3.82$        |              | $\chi^2(1) = 4.15^*$     |              | $\chi^2(1) = 2.45$        |              | $\chi^2(1) = 9.15^{**}$   |              | $\chi^2(1) = 7.52^{**}$   |              |
| Men                  | 37(71)                  | 15(29)       | 91(88)                  | 13(12)       | 73(97)                    | 26(84)       | 5(16)                     | 10(20)       | 50(63)                    | 30(38)       | 69(75)                   | 23(25)       | 26(84)                    | 5(16)        | 77(58)                    | 56(42)       | 81(87)                    | 12(13)       |
| Women                | 56(55)                  | 45(45)       | 177(87)                 | 27(13)       | 181(94)                   | 125(70)      | 53(30)                    | 55(37)       | 110(50)                   | 111(50)      | 120(63)                  | 71(37)       | 125(70)                   | 53(30)       | 70(40)                    | 103(60)      | 158(73)                   | 59(27)       |
| Place of Residence   | $\chi^2(1) = 1.21$      |              | $\chi^2(1) = 0.57$      |              | $\chi^2(1) = 1.72$        |              | $\chi^2(1) = 7.66^{**}$   |              | $\chi^2(1) = 0.51$        |              | $\chi^2(1) = 2.25$       |              | $\chi^2(1) = 0.67$        |              | $\chi^2(1) = 0.46$        |              | $\chi^2(1) = 0.46$        |              |
| Village/Town         | 0(0)                    | 0(0)         | 198(88)                 | 26(12)       | 219(95)                   | 104(69)      | 46(31)                    | 9(24)        | 115(49)                   | 120(51)      | 61(69)                   | 27(31)       | 104(69)                   | 46(31)       | 42(45)                    | 51(55)       | 172(76)                   | 54(24)       |
| City                 | 95(61)                  | 60(39)       | 72(84)                  | 14(16)       | 37(93)                    | 47(80)       | 12(20)                    | 56(35)       | 45(68)                    | 21(32)       | 128(65)                  | 69(35)       | 47(80)                    | 12(20)       | 109(50)                   | 108(50)      | 67(80)                    | 17(20)       |
| Level of Study       | $\chi^2(1) = 2.27$      |              | $\chi^2(1) = 2.27$      |              | $\chi^2(1) = 0.01$        |              | $\chi^2(1) = 1.48$        |              | $\chi^2(1) = 0.20$        |              | $\chi^2(1) = 0.83$       |              | $\chi^2(1) = 5.91^*$      |              | $\chi^2(1) = 0.55$        |              | $\chi^2(1) = 0.58$        |              |
| Bachelor             | 94(62)                  | 57(38)       | 190(84)                 | 36(16)       | 130(95)                   | 96(67)       | 47(33)                    | 65(33)       | 89(52)                    | 82(48)       | 165(67)                  | 80(33)       | 96(67)                    | 47(33)       | 136(48)                   | 147(52)      | 223(77)                   | 68(23)       |
| Master               | 1(25)                   | 3(75)        | 80(95)                  | 4(5)         | 126(95)                   | 55(83)       | 11(17)                    | 0(0)         | 71(55)                    | 59(45)       | 24(60)                   | 16(40)       | 55(83)                    | 11(17)       | 15(56)                    | 12(44)       | 16(84)                    | 3(16)        |
| Exposure to COVID-19 | $\chi^2(1) = 4.40^*$    |              | $\chi^2(1) = 4.40^*$    |              | $\chi^2(1) = 8.82^{**}$   |              | $\chi^2(1) = 10.27^{**}$  |              | $\chi^2(1) = 8.97^{**}$   |              | $\chi^2(1) = 6.95$       |              | $\chi^2(1) = 13.25^{***}$ |              | $\chi^2(1) = 7.90$        |              | $\chi^2(1) = 10.03^{**}$  |              |
| Lower                | 20(80)                  | 5(20)        | 167(92)                 | 14(8)        | 101(100)                  | 67(87)       | 10(13)                    | 11(17)       | 59(66)                    | 30(34)       | 59(79)                   | 16(21)       | 67(87)                    | 10(13)       | 39(65)                    | 21(35)       | 58(92)                    | 5(8)         |
| Higher               | 75(58)                  | 55(42)       | 103(80)                 | 26(20)       | 155(92)                   | 84(64)       | 48(36)                    | 54(40)       | 100(47)                   | 111(53)      | 130(62)                  | 80(38)       | 84(64)                    | 48(36)       | 112(45)                   | 138(55)      | 181(73)                   | 66(27)       |
| PIC: Total           | $\chi^2(1) = 8.14^{**}$ |              | $\chi^2(1) = 8.14^{**}$ |              | $\chi^2(1) = 9.36^{**}$   |              | $\chi^2(1) = 32.27^{***}$ |              | $\chi^2(1) = 12.73^{***}$ |              | $\chi^2(1) = 5.34^*$     |              | $\chi^2(1) = 29.98^{***}$ |              | $\chi^2(1) = 11.92^{***}$ |              | $\chi^2(1) = 17.48^{***}$ |              |
| Lower                | 28(82)                  | 6(18)        | 169(93)                 | 13(7)        | 160(98)                   | 107(86)      | 17(14)                    | 19(17)       | 55(71)                    | 23(29)       | 110(72)                  | 42(28)       | 107(86)                   | 17(14)       | 49(66)                    | 25(34)       | 128(88)                   | 18(12)       |
| Higher               | 67(55)                  | 54(45)       | 101(79)                 | 27(21)       | 96(90)                    | 44(52)       | 41(48)                    | 46(55)       | 105(47)                   | 118(53)      | 79(59)                   | 54(41)       | 44(52)                    | 41(48)       | 102(43)                   | 134(57)      | 111(68)                   | 53(32)       |
| PIC: Qualifications  | $\chi^2(1) = 8.06^{**}$ |              | $\chi^2(1) = 8.06^{**}$ |              | $\chi^2(1) = 11.62^{***}$ |              | $\chi^2(1) = 9.81^{**}$   |              | $\chi^2(1) = 3.76$        |              | $\chi^2(1) = 7.37^{**}$  |              | $\chi^2(1) = 23.19^{***}$ |              | $\chi^2(1) = 8.78^{**}$   |              | $\chi^2(1) = 11.31^{***}$ |              |
| Lower                | 40(77)                  | 12(23)       | 157(95)                 | 9(5)         | 138(99)                   | 90(87)       | 13(13)                    | 21(22)       | 46(63)                    | 27(37)       | 97(75)                   | 33(25)       | 90(87)                    | 13(13)       | 64(60)                    | 42(40)       | 107(87)                   | 16(13)       |
| Higher               | 55(53)                  | 48(47)       | 113(78)                 | 31(22)       | 118(90)                   | 61(58)       | 45(42)                    | 44(43)       | 114(50)                   | 114(50)      | 92(59)                   | 63(41)       | 61(58)                    | 45(42)       | 87(43)                    | 117(57)      | 132(71)                   | 55(29)       |
| PIC: Economic Status | $\chi^2(1) = 1.54$      |              | $\chi^2(1) = 1.54$      |              | $\chi^2(1) = 4.28^*$      |              | $\chi^2(1) = 4.42^*$      |              | $\chi^2(1) = 0.52$        |              | $\chi^2(1) = 7.47^*$     |              | $\chi^2(1) = 4.96^*$      |              | $\chi^2(1) = 15.00^{***}$ |              | $\chi^2(1) = 3.69$        |              |
| Lower                | 31(69)                  | 14(31)       | 138(95)                 | 7(5)         | 162(97)                   | 78(80)       | 20(20)                    | 19(24)       | 48(56)                    | 37(44)       | 73(74)                   | 25(26)       | 78(80)                    | 20(20)       | 73(63)                    | 43(37)       | 101(83)                   | 21(17)       |
| Higher               | 64(58)                  | 46(42)       | 132(80)                 | 33(20)       | 94(91)                    | 73(66)       | 38(34)                    | 46(38)       | 112(52)                   | 104(48)      | 116(62)                  | 71(38)       | 73(66)                    | 38(34)       | 78(40)                    | 116(60)      | 138(73)                   | 50(27)       |
| PIC: Relationships   | $\chi^2(1) = 5.62^*$    |              | $\chi^2(1) = 5.62^*$    |              | $\chi^2(1) = 0.07$        |              | $\chi^2(1) = 14.66^{***}$ |              | $\chi^2(1) = 21.95^{***}$ |              | $\chi^2(1) = 10.04^{**}$ |              | $\chi^2(1) = 13.39^{***}$ |              | $\chi^2(1) = 4.88^*$      |              | $\chi^2(1) = 13.05^{***}$ |              |
| Lower                | 22(81)                  | 5(19)        | 155(91)                 | 16(9)        | 119(95)                   | 97(82)       | 21(18)                    | 20(20)       | 67(74)                    | 24(26)       | 118(74)                  | 41(26)       | 97(82)                    | 21(18)       | 26(65)                    | 14(35)       | 129(86)                   | 21(14)       |
| Higher               | 73(57)                  | 55(43)       | 115(83)                 | 24(17)       | 137(94)                   | 54(59)       | 37(41)                    | 45(45)       | 93(44)                    | 117(56)      | 71(56)                   | 55(44)       | 54(59)                    | 37(41)       | 125(46)                   | 145(54)      | 110(69)                   | 50(31)       |
| Physical Activity    | $\chi^2(1) = 0.64$      |              | $\chi^2(1) = 0.64$      |              | $\chi^2(1) = 3.21$        |              | $\chi^2(1) = 2.94$        |              | $\chi^2(1) = 7.94^{**}$   |              | $\chi^2(1) = 0.95$       |              | $\chi^2(1) = 0.49$        |              | $\chi^2(1) = 1.73$        |              | $\chi^2(1) = 4.80^*$      |              |
| Insufficient         | 54(59)                  | 38(38)       | 176(85)                 | 31(15)       | 119(92)                   | 60(75)       | 20(25)                    | 46(37)       | 92(47)                    | 103(53)      | 123(64)                  | 68(36)       | 60(75)                    | 20(25)       | 125(47)                   | 140(53)      | 123(72)                   | 47(28)       |
| Sufficient           | 41(65)                  | 22(35)       | 94(91)                  | 9(9)         | 135(97)                   | 91(71)       | 38(29)                    | 19(25)       | 68(64)                    | 38(36)       | 66(70)                   | 28(30)       | 91(71)                    | 38(29)       | 26(58)                    | 19(42)       | 116(83)                   | 24(17)       |
| PH                   | $\chi^2(1) = 4.24^*$    |              | $\chi^2(1) = 4.24^*$    |              | $\chi^2(1) = 8.38^{**}$   |              | $\chi^2(1) = 2.25$        |              | $\chi^2(1) = 18.51^{***}$ |              | $\chi^2(1) = 4.97^*$     |              | $\chi^2(1) = 6.45^*$      |              | $\chi^2(1) = 13.29^{***}$ |              | $\chi^2(1) = 6.47^*$      |              |
| Better               | 90(64)                  | 51(36)       | 259(88)                 | 36(12)       | 220(96)                   | 142(75)      | 48(25)                    | 60(32)       | 158(57)                   | 121(43)      | 162(69)                  | 72(31)       | 142(75)                   | 48(25)       | 140(53)                   | 124(47)      | 234(78)                   | 65(22)       |
| Worse                | 5(36)                   | 9(64)        | 11(73)                  | 4(27)        | 36(86)                    | 9(47)        | 10(53)                    | 5(56)        | 2(9)                      | 20(91)       | 27(53)                   | 24(47)       | 9(47)                     | 10(53)       | 11(24)                    | 35(76)       | 5(45)                     | 6(55)        |
| PH Comparative       | $\chi^2(1) = 3.83$      |              | $\chi^2(1) = 3.83$      |              | $\chi^2(1) = 4.19^*$      |              | $\chi^2(1) = 2.39$        |              | $\chi^2(1) = 18.56^{***}$ |              | $\chi^2(1) = 4.50^*$     |              | $\chi^2(1) = 10.75^{**}$  |              | $\chi^2(1) = 11.18^{***}$ |              | $\chi^2(1) = 1.86$        |              |
| Better               | 88(66)                  | 46(34)       | 246(88)                 | 32(12)       | 205(96)                   | 138(76)      | 43(24)                    | 55(31)       | 151(58)                   | 109(42)      | 153(70)                  | 67(30)       | 138(76)                   | 43(24)       | 141(52)                   | 128(48)      | 231(78)                   | 66(22)       |
| Worse                | 7(33)                   | 14(67)       | 24(75)                  | 8(25)        | 51(89)                    | 13(46)       | 15(54)                    | 10(48)       | 9(22)                     | 32(78)       | 36(55)                   | 29(45)       | 13(46)                    | 15(54)       | 10(24)                    | 31(76)       | 8(62)                     | 5(38)        |

Note. PIC = Perceived Impact of COVID-19 on Students' Well-being; PH = Physical Health.  $^*p < 0.05$ ,  $^{**}p < 0.01$ ,  $^{***}p < 0.001$

**Table S3.** Logistic regression for depression symptoms among university students from Colombia during the first wave of the COVID-19 pandemic

| Variable                            | Estimate | 95% <i>CI</i> |             | Standard Error | Odds Ratio | <i>z</i> | Wald Test      |           |          | BCa 95% <i>CI</i> |             |
|-------------------------------------|----------|---------------|-------------|----------------|------------|----------|----------------|-----------|----------|-------------------|-------------|
|                                     |          | Lower bound   | Upper bound |                |            |          | Wald Statistic | <i>df</i> | <i>p</i> | Lower bound       | Upper bound |
| Intercept                           | -1.809   | -3.133        | -0.485      | 0.676          | 0.164      | -2.678   | 7.171          | 1         | 0.007    | -3.35             | -0.324      |
| Gender (Women)                      | 0.760    | 0.004         | 1.516       | 0.386          | 2.138      | 1.970    | 3.883          | 1         | 0.049    | -0.092            | 1.539       |
| Place of Residence (City)           | -        | -             | -           | -              | -          | -        | -              | -         | -        | -                 | -           |
| Level of Study (Master)             | -        | -             | -           | -              | -          | -        | -              | -         | -        | -                 | -           |
| Exposure to COVID-19 (High)         | 0.654    | -0.364        | 1.672       | 0.519          | 1.923      | 1.260    | 1.587          | 1         | 0.208    | -0.579            | 1.917       |
| PIC Total (High)                    | -0.356   | -1.631        | 0.919       | 0.650          | 0.700      | -0.548   | 0.300          | 1         | 0.584    | -1.812            | 1.200       |
| PIC Qualifications (High)           | 0.206    | -0.710        | 1.123       | 0.468          | 1.229      | 0.441    | 0.195          | 1         | 0.659    | -0.85             | 1.223       |
| PIC Economic Status (High)          | 0.486    | -0.343        | 1.316       | 0.423          | 1.626      | 1.149    | 1.320          | 1         | 0.251    | -0.519            | 1.350       |
| PIC Relationships (High)            | 0.463    | -0.680        | 1.605       | 0.583          | 1.589      | 0.794    | 0.630          | 1         | 0.427    | -0.996            | 1.847       |
| Physical Activity (Insufficient)    | -0.138   | -0.853        | 0.577       | 0.365          | 0.871      | -0.379   | 0.144          | 1         | 0.705    | -0.938            | 0.627       |
| Physical Health (Worse)             | 1.242    | -0.453        | 2.937       | 0.865          | 3.462      | 1.436    | 2.063          | 1         | 0.151    | -1.219            | 17.191      |
| Physical Health Comparative (Worse) | 1.175    | -0.111        | 2.460       | 0.656          | 3.237      | 1.791    | 3.208          | 1         | 0.073    | -0.546            | 2.598       |

*Note.* *CI* = confidence interval; BCa = Bias-corrected accelerated. Bootstrapping based on 5,000 successful replicates.

**Table S4.** Logistic regression for depression symptoms among university students from Czechia during the first wave of the COVID-19 pandemic

| Variable                            | Estimate | 95% <i>CI</i> |             | Standard Error | Odds Ratio | <i>z</i> | Wald Test      |           |          | BCa 95% <i>CI</i> |             |
|-------------------------------------|----------|---------------|-------------|----------------|------------|----------|----------------|-----------|----------|-------------------|-------------|
|                                     |          | Lower bound   | Upper bound |                |            |          | Wald Statistic | <i>df</i> | <i>p</i> | Lower bound       | Upper bound |
| Intercept                           | -2.382   | -3.227        | -1.536      | 0.431          | 0.092      | -5.520   | 30.474         | 1         | < .001   | -3.454            | -1.345      |
| Gender (Women)                      | -0.026   | -0.667        | 0.615       | 0.327          | 0.974      | -0.079   | 0.006          | 1         | 0.937    | -0.687            | 0.779       |
| Place of Residence (City)           | -0.173   | -0.880        | 0.534       | 0.361          | 0.841      | -0.479   | 0.230          | 1         | 0.632    | -0.943            | 0.623       |
| Level of Study (Master)             | -0.546   | -1.339        | 0.248       | 0.405          | 0.579      | -1.348   | 1.818          | 1         | 0.178    | -1.402            | 0.350       |
| Exposure to COVID-19 (High)         | 0.659    | 0.052         | 1.267       | 0.310          | 1.933      | 2.128    | 4.526          | 1         | 0.033    | -0.017            | 1.275       |
| PIC Total (High)                    | 0.821    | -0.139        | 1.781       | 0.490          | 2.273      | 1.677    | 2.813          | 1         | 0.094    | -0.400            | 1.901       |
| PIC Qualifications (High)           | -0.323   | -1.099        | 0.452       | 0.396          | 0.724      | -0.817   | 0.668          | 1         | 0.414    | -1.274            | 0.632       |
| PIC Economic Status (High)          | 0.444    | -0.279        | 1.166       | 0.369          | 1.559      | 1.204    | 1.449          | 1         | 0.229    | -0.402            | 1.275       |
| PIC Relationships (High)            | 0.210    | -0.553        | 0.974       | 0.389          | 1.234      | 0.540    | 0.292          | 1         | 0.589    | -0.673            | 1.034       |
| Physical Activity (Insufficient)    | 0.366    | -0.253        | 0.984       | 0.315          | 1.442      | 1.159    | 1.344          | 1         | 0.246    | -0.335            | 0.988       |
| Physical Health (Worse)             | -0.117   | -1.481        | 1.247       | 0.696          | 0.890      | -0.168   | 0.028          | 1         | 0.866    | -2.116            | 1.570       |
| Physical Health Comparative (Worse) | 1.301    | 0.396         | 2.207       | 0.462          | 3.673      | 2.816    | 7.930          | 1         | 0.005    | 0.119             | 2.223       |

*Note.* *CI* = confidence interval; BCa = Bias-corrected accelerated. Bootstrapping based on 5,000 successful replicates.

**Table S5.** Logistic regression for depression symptoms among university students from Germany during the first wave of the COVID-19 pandemic

| Variable                            | Estimate | 95% <i>CI</i> |             | Standard Error | Odds Ratio | <i>z</i> | Wald Test      |           |          | BCa 95% <i>CI</i> |             |
|-------------------------------------|----------|---------------|-------------|----------------|------------|----------|----------------|-----------|----------|-------------------|-------------|
|                                     |          | Lower bound   | Upper bound |                |            |          | Wald Statistic | <i>df</i> | <i>p</i> | Lower bound       | Upper bound |
| Intercept                           | -2.036   | -2.978        | -1.095      | 0.480          | 0.131      | -4.239   | 17.97          | 1         | < .001   | -2.967            | -1.035      |
| Gender (Women)                      | -0.138   | -0.775        | 0.499       | 0.325          | 0.871      | -0.426   | 0.181          | 1         | 0.670    | -0.816            | 0.608       |
| Place of Residence (City)           | 0.359    | -0.445        | 1.162       | 0.410          | 1.431      | 0.875    | 0.765          | 1         | 0.382    | -0.596            | 1.237       |
| Level of Study (Master)             | -0.073   | -0.643        | 0.498       | 0.291          | 0.930      | -0.250   | 0.063          | 1         | 0.802    | -0.699            | 0.564       |
| Exposure to COVID-19 (High)         | 0.337    | -0.271        | 0.945       | 0.310          | 1.401      | 1.086    | 1.179          | 1         | 0.278    | -0.319            | 0.982       |
| PIC Total (High)                    | 1.326    | 0.483         | 2.170       | 0.430          | 3.768      | 3.083    | 9.505          | 1         | 0.002    | 0.351             | 2.101       |
| PIC Qualifications (High)           | 0.274    | -0.439        | 0.988       | 0.364          | 1.315      | 0.753    | 0.567          | 1         | 0.451    | -0.531            | 0.992       |
| PIC Economic Status (High)          | 0.261    | -0.387        | 0.909       | 0.331          | 1.298      | 0.789    | 0.623          | 1         | 0.430    | -0.431            | 0.934       |
| PIC Relationships (High)            | 0.197    | -0.475        | 0.869       | 0.343          | 1.218      | 0.574    | 0.330          | 1         | 0.566    | -0.557            | 0.903       |
| Physical Activity (Insufficient)    | 0.441    | -0.165        | 1.048       | 0.310          | 1.555      | 1.426    | 2.033          | 1         | 0.154    | -0.255            | 1.068       |
| Physical Health (Worse)             | 1.382    | 0.419         | 2.345       | 0.491          | 3.983      | 2.812    | 7.909          | 1         | 0.005    | 0.232             | 2.395       |
| Physical Health Comparative (Worse) | 0.226    | -0.619        | 1.071       | 0.431          | 1.253      | 0.523    | 0.274          | 1         | 0.601    | -0.728            | 1.150       |

*Note.* *CI* = confidence interval; BCa = Bias-corrected accelerated. Bootstrapping based on 5,000 successful replicates.

**Table S6.** Logistic regression for depression symptoms among university students from Israel during the first wave of the COVID-19 pandemic

| Variable                            | Estimate | 95% <i>CI</i> |             | Standard Error | Odds Ratio | <i>z</i> | Wald Test      |           |          | BCa 95% <i>CI</i> |             |
|-------------------------------------|----------|---------------|-------------|----------------|------------|----------|----------------|-----------|----------|-------------------|-------------|
|                                     |          | Lower bound   | Upper bound |                |            |          | Wald Statistic | <i>df</i> | <i>p</i> | Lower bound       | Upper bound |
| Intercept                           | -1.911   | -3.078        | -0.745      | 0.595          | 0.148      | -3.212   | 10.314         | 1         | 0.001    | -3.116            | -0.589      |
| Gender (Women)                      | 0.515    | -0.268        | 1.297       | 0.399          | 1.673      | 1.289    | 1.661          | 1         | 0.198    | -0.366            | 1.307       |
| Place of Residence (City)           | -0.379   | -1.229        | 0.470       | 0.433          | 0.684      | -0.875   | 0.766          | 1         | 0.381    | -1.368            | 0.597       |
| Level of Study (Master)             | -        | -             | -           | -              | -          | -        | -              | -         | -        | -                 | -           |
| Exposure to COVID-19 (High)         | 0.862    | 0.092         | 1.633       | 0.393          | 2.368      | 2.193    | 4.809          | 1         | 0.028    | -0.059            | 1.700       |
| PIC Total (High)                    | 1.348    | 0.302         | 2.394       | 0.534          | 3.851      | 2.527    | 6.385          | 1         | 0.012    | 0.147             | 2.524       |
| PIC Qualifications (High)           | -0.125   | -1.026        | 0.777       | 0.460          | 0.883      | -0.271   | 0.073          | 1         | 0.786    | -1.196            | 0.889       |
| PIC Economic Status (High)          | 0.227    | -0.611        | 1.065       | 0.428          | 1.255      | 0.532    | 0.283          | 1         | 0.595    | -0.732            | 1.167       |
| PIC Relationships (High)            | 0.468    | -0.279        | 1.215       | 0.381          | 1.596      | 1.227    | 1.505          | 1         | 0.220    | -0.338            | 1.271       |
| Physical Activity (Insufficient)    | -0.290   | -0.980        | 0.400       | 0.352          | 0.748      | -0.824   | 0.679          | 1         | 0.410    | -1.037            | 0.475       |
| Physical Health (Worse)             | -        | -             | -           | -              | -          | -        | -              | -         | -        | -                 | -           |
| Physical Health Comparative (Worse) | 0.792    | -0.300        | 1.884       | 0.557          | 2.207      | 1.421    | 2.019          | 1         | 0.155    | -0.418            | 1.936       |

*Note.* *CI* = confidence interval; BCa = Bias-corrected accelerated. Bootstrapping based on 5,000 successful replicates.

**Table S7.** Logistic regression for depression symptoms among university students from Poland during the first wave of the COVID-19 pandemic

| Variable                            | Estimate | 95% <i>CI</i> |             | Standard Error | Odds Ratio | <i>z</i> | Wald Test      |           |          | BCa 95% <i>CI</i> |             |
|-------------------------------------|----------|---------------|-------------|----------------|------------|----------|----------------|-----------|----------|-------------------|-------------|
|                                     |          | Lower bound   | Upper bound |                |            |          | Wald Statistic | <i>df</i> | <i>p</i> | Lower bound       | Upper bound |
| Intercept                           | -2.045   | -3.034        | -1.056      | 0.505          | 0.129      | -4.052   | 16.419         | 1         | < .001   | -2.964            | -0.942      |
| Gender (Women)                      | 0.784    | 0.190         | 1.377       | 0.303          | 2.190      | 2.589    | 6.701          | 1         | 0.010    | 0.115             | 1.393       |
| Place of Residence (City)           | 0.047    | -0.55         | 0.645       | 0.305          | 1.049      | 0.156    | 0.024          | 1         | 0.876    | -0.598            | 0.703       |
| Level of Study (Master)             | -0.169   | -0.698        | 0.360       | 0.270          | 0.845      | -0.625   | 0.390          | 1         | 0.532    | -0.733            | 0.436       |
| Exposure to COVID-19 (High)         | 0.548    | -0.043        | 1.138       | 0.301          | 1.729      | 1.818    | 3.305          | 1         | 0.069    | -0.079            | 1.148       |
| PIC Total (High)                    | 0.517    | -0.396        | 1.431       | 0.466          | 1.678      | 1.110    | 1.232          | 1         | 0.267    | -0.488            | 1.560       |
| PIC Qualifications (High)           | -0.138   | -0.871        | 0.594       | 0.374          | 0.871      | -0.370   | 0.137          | 1         | 0.711    | -0.942            | 0.677       |
| PIC Economic Status (High)          | 0.005    | -0.63         | 0.640       | 0.324          | 1.005      | 0.016    | 2.604e -4      | 1         | 0.987    | -0.644            | 0.731       |
| PIC Relationships (High)            | 1.000    | 0.299         | 1.700       | 0.358          | 2.718      | 2.796    | 7.819          | 1         | 0.005    | 0.197             | 1.653       |
| Physical Activity (Insufficient)    | -0.281   | -0.822        | 0.261       | 0.276          | 0.755      | -1.016   | 1.032          | 1         | 0.310    | -0.878            | 0.280       |
| Physical Health (Worse)             | 1.187    | -0.318        | 2.691       | 0.767          | 3.276      | 1.546    | 2.391          | 1         | 0.122    | -1.032            | 3.447       |
| Physical Health Comparative (Worse) | 1.268    | 0.286         | 2.250       | 0.501          | 3.554      | 2.531    | 6.408          | 1         | 0.011    | 0.126             | 2.323       |

*Note.* *CI* = confidence interval; BCa = Bias-corrected accelerated. Bootstrapping based on 5,000 successful replicates.

**Table S8.** Logistic regression for depression symptoms among university students from Russia during the first wave of the COVID-19 pandemic

| Variable                            | Estimate | 95% <i>CI</i> |             | Standard Error | Odds Ratio | <i>z</i> | Wald Test      |           |          | BCa 95% <i>CI</i> |             |
|-------------------------------------|----------|---------------|-------------|----------------|------------|----------|----------------|-----------|----------|-------------------|-------------|
|                                     |          | Lower bound   | Upper bound |                |            |          | Wald Statistic | <i>df</i> | <i>p</i> | Lower bound       | Upper bound |
| Intercept                           | -2.790   | -3.826        | -1.755      | 0.528          | 0.061      | -5.281   | 27.889         | 1         | < .001   | -4.014            | -1.579      |
| Gender (Women)                      | 0.930    | 0.300         | 1.560       | 0.321          | 2.534      | 2.893    | 8.367          | 1         | 0.004    | 0.209             | 1.590       |
| Place of Residence (City)           | -0.097   | -0.697        | 0.503       | 0.306          | 0.908      | -0.317   | 0.101          | 1         | 0.751    | -0.767            | 0.606       |
| Level of Study (Master)             | 0.539    | -0.268        | 1.346       | 0.412          | 1.714      | 1.309    | 1.713          | 1         | 0.191    | -0.343            | 1.384       |
| Exposure to COVID-19 (High)         | 0.762    | 0.080         | 1.443       | 0.348          | 2.142      | 2.190    | 4.798          | 1         | 0.028    | -0.018            | 1.535       |
| PIC Total (High)                    | -0.482   | -1.373        | 0.41        | 0.455          | 0.618      | -1.059   | 1.122          | 1         | 0.290    | -1.507            | 0.544       |
| PIC Qualifications (High)           | 0.900    | 0.175         | 1.624       | 0.370          | 2.459      | 2.433    | 5.920          | 1         | 0.015    | 0.102             | 1.636       |
| PIC Economic Status (High)          | 0.412    | -0.267        | 1.091       | 0.347          | 1.510      | 1.188    | 1.412          | 1         | 0.235    | -0.382            | 1.088       |
| PIC Relationships (High)            | 1.39     | 0.681         | 2.100       | 0.362          | 4.016      | 3.842    | 14.758         | 1         | < .001   | 0.495             | 2.157       |
| Physical Activity (Insufficient)    | -0.775   | -1.375        | -0.176      | 0.306          | 0.461      | -2.535   | 6.425          | 1         | 0.011    | -1.375            | -0.137      |
| Physical Health (Worse)             | 1.388    | 0.472         | 2.304       | 0.467          | 4.006      | 2.971    | 8.826          | 1         | 0.003    | 0.425             | 2.305       |
| Physical Health Comparative (Worse) | -0.178   | -1.004        | 0.647       | 0.421          | 0.837      | -0.424   | 0.179          | 1         | 0.672    | -1.029            | 0.683       |

*Note.* *CI* = confidence interval; BCa = Bias-corrected accelerated. Bootstrapping based on 5,000 successful replicates.



**Table S9.** Logistic regression for depression symptoms among university students from Slovenia during the first wave of the COVID-19 pandemic

| Variable                            | Estimate | 95% <i>CI</i> |             | Standard Error | Odds Ratio | <i>z</i> | Wald Test      |           |          | BCa 95% <i>CI</i> |             |
|-------------------------------------|----------|---------------|-------------|----------------|------------|----------|----------------|-----------|----------|-------------------|-------------|
|                                     |          | Lower bound   | Upper bound |                |            |          | Wald Statistic | <i>df</i> | <i>p</i> | Lower bound       | Upper bound |
| Intercept                           | -2.815   | -4.221        | -1.409      | 0.717          | 0.060      | -3.925   | 15.402         | 1         | < .001   | -4.469            | -1.061      |
| Gender (Women)                      | -0.114   | -1.193        | 0.966       | 0.551          | 0.893      | -0.206   | 0.043          | 1         | 0.837    | -1.736            | 1.353       |
| Place of Residence (City)           | -0.080   | -0.911        | 0.752       | 0.424          | 0.923      | -0.188   | 0.035          | 1         | 0.851    | -1.105            | 0.885       |
| Level of Study (Master)             | -0.648   | -1.481        | 0.186       | 0.425          | 0.523      | -1.524   | 2.321          | 1         | 0.128    | -1.618            | 0.313       |
| Exposure to COVID-19 (High)         | 1.139    | 0.258         | 2.021       | 0.450          | 3.125      | 2.534    | 6.423          | 1         | 0.011    | 0.058             | 2.114       |
| PIC Total (High)                    | 0.661    | -0.482        | 1.805       | 0.583          | 1.937      | 1.133    | 1.284          | 1         | 0.257    | -0.773            | 1.999       |
| PIC Qualifications (High)           | 1.260    | 0.337         | 2.183       | 0.471          | 3.524      | 2.675    | 7.154          | 1         | 0.007    | 0.155             | 2.076       |
| PIC Economic Status (High)          | 0.131    | -0.749        | 1.010       | 0.449          | 1.140      | 0.291    | 0.085          | 1         | 0.771    | -0.834            | 1.129       |
| PIC Relationships (High)            | 0.363    | -0.575        | 1.302       | 0.479          | 1.438      | 0.759    | 0.576          | 1         | 0.448    | -0.802            | 1.466       |
| Physical Activity (Insufficient)    | -0.074   | -0.828        | 0.680       | 0.385          | 0.929      | -0.192   | 0.037          | 1         | 0.848    | -0.896            | 0.757       |
| Physical Health (Worse)             | 1.053    | -0.377        | 2.482       | 0.729          | 2.865      | 1.443    | 2.084          | 1         | 0.149    | -0.669            | 2.539       |
| Physical Health Comparative (Worse) | 1.613    | 0.402         | 2.825       | 0.618          | 5.019      | 2.610    | 6.812          | 1         | 0.009    | 0.165             | 2.916       |

*Note.* *CI* = confidence interval; BCa = Bias-corrected accelerated. Bootstrapping based on 5,000 successful replicates.

**Table S10.** Logistic regression for depression symptoms among university students from Turkey during the first wave of the COVID-19 pandemic

| Variable                            | Estimate | 95% CI      |             | Standard Error | Odds Ratio | z      | Wald Test      |    |        | BCa 95% CI  |             |
|-------------------------------------|----------|-------------|-------------|----------------|------------|--------|----------------|----|--------|-------------|-------------|
|                                     |          | Lower bound | Upper bound |                |            |        | Wald Statistic | df | p      | Lower bound | Upper bound |
| Intercept                           | -1.464   | -2.568      | -0.360      | 0.563          | 0.231      | -2.599 | 6.752          | 1  | 0.009  | -2.605      | -0.249      |
| Gender (Women)                      | 0.906    | 0.398       | 1.413       | 0.259          | 2.474      | 3.499  | 12.241         | 1  | < .001 | 0.350       | 1.429       |
| Place of Residence (City)           | 0.275    | -0.289      | 0.839       | 0.288          | 1.317      | 0.955  | 0.913          | 1  | 0.339  | -0.335      | 0.88        |
| Level of Study (Master)             | -0.503   | -1.370      | 0.363       | 0.442          | 0.604      | -1.139 | 1.296          | 1  | 0.255  | -1.367      | 0.345       |
| Exposure to COVID-19 (High)         | 0.450    | -0.187      | 1.087       | 0.325          | 1.568      | 1.384  | 1.916          | 1  | 0.166  | -0.275      | 1.123       |
| PIC Total (High)                    | 0.115    | -0.762      | 0.992       | 0.447          | 1.122      | 0.257  | 0.066          | 1  | 0.797  | -0.840      | 1.066       |
| PIC Qualifications (High)           | 0.116    | -0.530      | 0.762       | 0.330          | 1.123      | 0.351  | 0.123          | 1  | 0.725  | -0.654      | 0.808       |
| PIC Economic Status (High)          | 0.606    | -0.001      | 1.213       | 0.310          | 1.833      | 1.958  | 3.835          | 1  | 0.050  | -0.084      | 1.246       |
| PIC Relationships (High)            | 0.445    | -0.422      | 1.312       | 0.442          | 1.561      | 1.007  | 1.013          | 1  | 0.314  | -0.544      | 1.353       |
| Physical Activity (Insufficient)    | -0.248   | -0.946      | 0.451       | 0.356          | 0.781      | -0.695 | 0.483          | 1  | 0.487  | -0.970      | 0.474       |
| Physical Health (Worse)             | -0.192   | -1.279      | 0.894       | 0.554          | 0.825      | -0.347 | 0.120          | 1  | 0.728  | -1.622      | 1.134       |
| Physical Health Comparative (Worse) | 1.336    | 0.090       | 2.583       | 0.636          | 3.805      | 2.101  | 4.416          | 1  | 0.036  | -0.283      | 2.602       |

Note. CI = confidence interval; BCa = Bias-corrected accelerated. Bootstrapping based on 5,000 successful replicates.

**Table S11.** Logistic regression for depression symptoms among university students from Ukraine during the first wave of the COVID-19 pandemic

| Variable                            | Estimate | 95% <i>CI</i> |             | Standard Error | Odds Ratio | <i>z</i> | Wald Test      |           |          | BCa 95% <i>CI</i> |             |
|-------------------------------------|----------|---------------|-------------|----------------|------------|----------|----------------|-----------|----------|-------------------|-------------|
|                                     |          | Lower bound   | Upper bound |                |            |          | Wald Statistic | <i>df</i> | <i>p</i> | Lower bound       | Upper bound |
| Intercept                           | -2.698   | -3.772        | -1.625      | 0.547          | 0.067      | -4.929   | 24.293         | 1         | < .001   | -3.933            | -1.322      |
| Gender (Women)                      | 0.803    | 0.150         | 1.456       | 0.333          | 2.231      | 2.409    | 5.806          | 1         | 0.016    | 0.070             | 1.512       |
| Place of Residence (City)           | -0.179   | -0.800        | 0.442       | 0.317          | 0.836      | -0.566   | 0.320          | 1         | 0.571    | -0.864            | 0.496       |
| Level of Study (Master)             | -0.080   | -1.317        | 1.156       | 0.631          | 0.923      | -0.127   | 0.016          | 1         | 0.899    | -1.698            | 1.337       |
| Exposure to COVID-19 (High)         | 0.873    | 0.060         | 1.686       | 0.415          | 2.394      | 2.105    | 4.403          | 1         | 0.035    | -0.037            | 1.749       |
| PIC Total (High)                    | 0.428    | -0.420        | 1.276       | 0.433          | 1.534      | 0.989    | 0.978          | 1         | 0.323    | -0.440            | 1.371       |
| PIC Qualifications (High)           | 0.096    | -0.608        | 0.800       | 0.359          | 1.101      | 0.268    | 0.072          | 1         | 0.789    | -0.681            | 0.795       |
| PIC Economic Status (High)          | 0.360    | -0.282        | 1.001       | 0.327          | 1.433      | 1.099    | 1.208          | 1         | 0.272    | -0.347            | 1.033       |
| PIC Relationships (High)            | 0.479    | -0.218        | 1.175       | 0.355          | 1.614      | 1.346    | 1.813          | 1         | 0.178    | -0.281            | 1.230       |
| Physical Activity (Insufficient)    | -0.851   | -1.413        | -0.288      | 0.287          | 0.427      | -2.965   | 8.791          | 1         | 0.003    | -1.396            | -0.218      |
| Physical Health (Worse)             | 0.303    | -1.149        | 1.755       | 0.741          | 1.354      | 0.409    | 0.168          | 1         | 0.682    | -1.987            | 2.138       |
| Physical Health Comparative (Worse) | 1.211    | -0.175        | 2.597       | 0.707          | 3.358      | 1.713    | 2.934          | 1         | 0.087    | -0.798            | 2.750       |

*Note.* *CI* = confidence interval; BCa = Bias-corrected accelerated. Bootstrapping based on 5,000 successful replicates.

**Table S12.** Logistic regression for anxiety symptoms among university students from Colombia during the first wave of the COVID-19 pandemic

| Variable                            | Estimate | 95% CI      |             | Standard Error | Odds Ratio | z      | Wald Test      |    |        | BCa 95% CI  |             |
|-------------------------------------|----------|-------------|-------------|----------------|------------|--------|----------------|----|--------|-------------|-------------|
|                                     |          | Lower bound | Upper bound |                |            |        | Wald Statistic | df | p      | Lower bound | Upper bound |
| Intercept                           | -3.041   | -4.628      | -1.455      | 0.810          | 0.048      | -3.757 | 14.115         | 1  | < .001 | -4.956      | -1.056      |
| Gender (Women)                      | 0.679    | -0.126      | 1.484       | 0.411          | 1.971      | 1.652  | 2.730          | 1  | 0.098  | -0.202      | 1.563       |
| Place of Residence (City)           | -        | -           | -           | -              | -          | -      | -              | -  | -      | -           | -           |
| Level of Study (Master)             | -        | -           | -           | -              | -          | -      | -              | -  | -      | -           | -           |
| Exposure to COVID-19 (High)         | 0.916    | -0.228      | 2.06        | 0.583          | 2.499      | 1.507  | 2.465          | 1  | 0.116  | -0.497      | 2.229       |
| PIC Total (High)                    | 0.329    | -1.058      | 1.716       | 0.708          | 1.389      | 0.464  | 0.216          | 1  | 0.642  | -1.401      | 1.877       |
| PIC Qualifications (High)           | 0.439    | -0.527      | 1.405       | 0.493          | 1.551      | 0.890  | 0.793          | 1  | 0.373  | -0.696      | 1.624       |
| PIC Economic Status (High)          | -0.169   | -1.038      | 0.700       | 0.443          | 0.844      | -0.382 | 0.146          | 1  | 0.703  | -1.121      | 0.891       |
| PIC Relationships (High)            | 0.857    | -0.449      | 2.162       | 0.666          | 2.355      | 1.286  | 1.653          | 1  | 0.199  | -0.743      | 2.474       |
| Physical Activity (Insufficient)    | -0.151   | -0.903      | 0.601       | 0.383          | 0.860      | -0.394 | 0.155          | 1  | 0.694  | -0.948      | 0.706       |
| Physical Health (Worse)             | 0.475    | -0.947      | 1.897       | 0.726          | 1.609      | 0.655  | 0.429          | 1  | 0.512  | -1.696      | 2.003       |
| Physical Health Comparative (Worse) | 1.346    | 0.132       | 2.560       | 0.619          | 3.843      | 2.173  | 4.723          | 1  | 0.030  | -0.266      | 2.819       |

*Note.* CI = confidence interval; BCa = Bias-corrected accelerated. Bootstrapping based on 5,000 successful replicates.

**Table S13.** Logistic regression for anxiety symptoms among university students from Czechia during the first wave of the COVID-19 pandemic

| Variable                            | Estimate | 95% <i>CI</i> |             | Standard Error | Odds Ratio | z      | Wald Test      |    |        | BCa 95% <i>CI</i> |             |
|-------------------------------------|----------|---------------|-------------|----------------|------------|--------|----------------|----|--------|-------------------|-------------|
|                                     |          | Lower bound   | Upper bound |                |            |        | Wald Statistic | df | p      | Lower bound       | Upper bound |
| Intercept                           | -4.064   | -5.334        | -2.794      | 0.648          | 0.017      | -6.272 | 39.338         | 1  | < .001 | -5.990            | -2.250      |
| Gender (Women)                      | 0.369    | -0.462        | 1.200       | 0.424          | 1.446      | 0.870  | 0.757          | 1  | 0.384  | -0.589            | 1.542       |
| Place of Residence (City)           | 0.788    | -0.033        | 1.609       | 0.419          | 2.198      | 1.881  | 3.536          | 1  | 0.06   | -0.257            | 1.677       |
| Level of Study (Master)             | -1.287   | -2.476        | -0.099      | 0.607          | 0.276      | -2.122 | 4.505          | 1  | 0.034  | -2.414            | -0.060      |
| Exposure to COVID-19 (High)         | 0.905    | 0.134         | 1.677       | 0.394          | 2.473      | 2.300  | 5.289          | 1  | 0.021  | 0.024             | 1.764       |
| PIC Total (High)                    | -0.082   | -1.313        | 1.149       | 0.628          | 0.921      | -0.131 | 0.017          | 1  | 0.896  | -1.472            | 1.254       |
| PIC Qualifications (High)           | 1.185    | 0.180         | 2.190       | 0.513          | 3.272      | 2.312  | 5.345          | 1  | 0.021  | -0.038            | 2.361       |
| PIC Economic Status (High)          | 1.251    | 0.225         | 2.277       | 0.523          | 3.495      | 2.391  | 5.716          | 1  | 0.017  | 0.100             | 2.533       |
| PIC Relationships (High)            | 0.094    | -0.899        | 1.087       | 0.507          | 1.099      | 0.186  | 0.034          | 1  | 0.853  | -1.029            | 1.223       |
| Physical Activity (Insufficient)    | -0.936   | -1.832        | -0.041      | 0.457          | 0.392      | -2.049 | 4.200          | 1  | 0.040  | -1.840            | -0.037      |
| Physical Health (Worse)             | -0.546   | -2.033        | 0.942       | 0.759          | 0.579      | -0.719 | 0.517          | 1  | 0.472  | -2.767            | 1.538       |
| Physical Health Comparative (Worse) | 1.120    | 0.006         | 2.234       | 0.568          | 3.064      | 1.970  | 3.881          | 1  | 0.049  | -0.519            | 2.504       |

*Note.* *CI* = confidence interval; BCa = Bias-corrected accelerated. Bootstrapping based on 5,000 successful replicates.

**Table S14.** Logistic regression for anxiety symptoms among university students from Germany during the first wave of the COVID-19 pandemic

| Variable                            | Estimate | 95% CI      |             | Standard Error | Odds Ratio | z      | Wald Test      |    |       | BCa 95% CI  |             |
|-------------------------------------|----------|-------------|-------------|----------------|------------|--------|----------------|----|-------|-------------|-------------|
|                                     |          | Lower bound | Upper bound |                |            |        | Wald Statistic | df | p     | Lower bound | Upper bound |
| Intercept                           | -22.372  | -3221.57    | 3176.825    | 1632.273       | 1.922e -10 | -0.014 | 1.879e -4      | 1  | 0.989 | -41.319     | -19.201     |
| Gender (Women)                      | 0.665    | -0.958      | 2.288       | 0.828          | 1.945      | 0.804  | 0.646          | 1  | 0.422 | -1.809      | 20.185      |
| Place of Residence (City)           | 0.297    | -1.228      | 1.821       | 0.778          | 1.345      | 0.381  | 0.146          | 1  | 0.703 | -18.96      | 2.780       |
| Level of Study (Master)             | 0.198    | -1.073      | 1.469       | 0.649          | 1.219      | 0.305  | 0.093          | 1  | 0.760 | -1.751      | 2.386       |
| Exposure to COVID-19 (High)         | 17.571   | -3181.63    | 3216.767    | 1632.273       | 4.277e +7  | 0.011  | 1.159e -4      | 1  | 0.991 | -32.142     | 18.288      |
| PIC Total (High)                    | 0.920    | -0.986      | 2.826       | 0.973          | 2.510      | 0.946  | 0.895          | 1  | 0.344 | -2.457      | 4.307       |
| PIC Qualifications (High)           | 1.908    | -0.412      | 4.227       | 1.183          | 6.738      | 1.612  | 2.599          | 1  | 0.107 | -43.958     | 19.059      |
| PIC Economic Status (High)          | 0.753    | -0.702      | 2.208       | 0.742          | 2.124      | 1.014  | 1.029          | 1  | 0.31  | -3.297      | 2.926       |
| PIC Relationships (High)            | 0.331    | -1.127      | 1.789       | 0.744          | 1.392      | 0.445  | 0.198          | 1  | 0.657 | -2.949      | 2.664       |
| Physical Activity (Insufficient)    | 0.122    | -1.197      | 1.442       | 0.673          | 1.130      | 0.182  | 0.033          | 1  | 0.856 | -1.742      | 2.344       |
| Physical Health (Worse)             | -0.638   | -2.144      | 0.868       | 0.768          | 0.528      | -0.831 | 0.690          | 1  | 0.406 | -2.930      | 2.302       |
| Physical Health Comparative (Worse) | -0.699   | -1.996      | 0.598       | 0.662          | 0.497      | -1.056 | 1.116          | 1  | 0.291 | -2.652      | 1.266       |

*Note.* CI = confidence interval; BCa = Bias-corrected accelerated. Bootstrapping based on 5,000 successful replicates.

**Table S15.** Logistic regression for anxiety symptoms among university students from Israel during the first wave of the COVID-19 pandemic

| Variable                            | Estimate | 95% <i>CI</i> |             | Standard Error | Odds Ratio | <i>z</i> | Wald Test      |           |          | BCa 95% <i>CI</i> |             |
|-------------------------------------|----------|---------------|-------------|----------------|------------|----------|----------------|-----------|----------|-------------------|-------------|
|                                     |          | Lower bound   | Upper bound |                |            |          | Wald Statistic | <i>df</i> | <i>p</i> | Lower bound       | Upper bound |
| Intercept                           | -3.066   | -4.442        | -1.69       | 0.702          | 0.047      | -4.367   | 19.074         | 1         | < .001   | -4.355            | -1.529      |
| Gender (Women)                      | 1.028    | 0.155         | 1.901       | 0.445          | 2.795      | 2.307    | 5.324          | 1         | 0.021    | 0.039             | 2.007       |
| Place of Residence (City)           | 0.506    | -0.383        | 1.503       | 0.481          | 1.751      | 1.164    | 1.355          | 1         | 0.244    | -0.411            | 1.553       |
| Level of Study (Master)             | -        | -             | -           | -              | -          | -        | -              | -         | -        | -                 | -           |
| Exposure to COVID-19 (High)         | 0.648    | -0.201        | 1.497       | 0.433          | 1.912      | 1.495    | 2.236          | 1         | 0.135    | -0.351            | 1.556       |
| PIC Total (High)                    | 1.964    | 0.757         | 3.172       | 0.616          | 7.130      | 3.188    | 10.166         | 1         | 0.001    | 0.471             | 3.300       |
| PIC Qualifications (High)           | -0.118   | -1.113        | 0.877       | 0.508          | 0.889      | -0.233   | 0.054          | 1         | 0.816    | -1.303            | 0.953       |
| PIC Economic Status (High)          | -0.858   | -1.860        | 0.143       | 0.511          | 0.424      | -1.680   | 2.821          | 1         | 0.093    | -1.893            | 0.261       |
| PIC Relationships (High)            | 0.548    | -0.236        | 1.333       | 0.400          | 1.730      | 1.370    | 1.876          | 1         | 0.171    | -0.350            | 1.384       |
| Physical Activity (Insufficient)    | -0.258   | -0.996        | 0.479       | 0.376          | 0.772      | -0.687   | 0.472          | 1         | 0.492    | -1.104            | 0.631       |
| Physical Health (Worse)             | -        | -             | -           | -              | -          | -        | -              | -         | -        | -                 | -           |
| Physical Health Comparative (Worse) | 0.264    | -0.795        | 1.323       | 0.540          | 1.302      | 0.488    | 0.238          | 1         | 0.626    | -0.801            | 1.256       |

*Note.* *CI* = confidence interval; BCa = Bias-corrected accelerated. Bootstrapping based on 5,000 successful replicates.

**Table S16.** Logistic regression for anxiety symptoms among university students from Poland during the first wave of the COVID-19 pandemic

| Variable                            | Estimate | 95% <i>CI</i> |             | Standard Error | Odds Ratio | <i>z</i> | Wald Test      |           |          | BCa 95% <i>CI</i> |             |
|-------------------------------------|----------|---------------|-------------|----------------|------------|----------|----------------|-----------|----------|-------------------|-------------|
|                                     |          | Lower bound   | Upper bound |                |            |          | Wald Statistic | <i>df</i> | <i>p</i> | Lower bound       | Upper bound |
| Intercept                           | -1.819   | -2.795        | -0.844      | 0.498          | 0.162      | -3.656   | 13.365         | 1         | < .001   | -2.807            | -0.691      |
| Gender (Women)                      | -0.154   | -1.080        | 0.772       | 0.472          | 0.857      | -0.326   | 0.106          | 1         | 0.744    | -1.104            | 0.902       |
| Place of Residence (City)           | 0.216    | -0.508        | 0.940       | 0.369          | 1.241      | 0.585    | 0.343          | 1         | 0.558    | -0.609            | 0.991       |
| Level of Study (Master)             | -0.127   | -0.771        | 0.517       | 0.329          | 0.880      | -0.388   | 0.150          | 1         | 0.698    | -0.860            | 0.578       |
| Exposure to COVID-19 (High)         | 1.241    | 0.513         | 1.970       | 0.372          | 3.460      | 3.339    | 11.147         | 1         | < .001   | 0.432             | 2.004       |
| PIC Total (High)                    | 0.539    | -0.056        | 1.134       | 0.304          | 1.715      | 1.775    | 3.152          | 1         | 0.076    | -0.163            | 1.155       |
| PIC Qualifications (High)           | -0.655   | -1.271        | -0.039      | 0.314          | 0.519      | -2.085   | 4.346          | 1         | 0.037    | -1.300            | -0.001      |
| PIC Economic Status (High)          | 0.062    | -0.470        | 0.595       | 0.272          | 1.064      | 0.229    | 0.053          | 1         | 0.819    | -0.515            | 0.632       |
| PIC Relationships (High)            | 0.765    | 0.165         | 1.365       | 0.306          | 2.148      | 2.499    | 6.244          | 1         | 0.012    | 0.069             | 1.403       |
| Physical Activity (Insufficient)    | -0.479   | -1.027        | 0.068       | 0.279          | 0.619      | -1.716   | 2.944          | 1         | 0.086    | -1.069            | 0.104       |
| Physical Health (Worse)             | 1.978    | 0.297         | 3.659       | 0.858          | 7.228      | 2.306    | 5.317          | 1         | 0.021    | -0.462            | 16.743      |
| Physical Health Comparative (Worse) | 0.819    | -0.117        | 1.754       | 0.477          | 2.267      | 1.715    | 2.942          | 1         | 0.086    | -0.273            | 1.842       |

*Note.* *CI* = confidence interval; BCa = Bias-corrected accelerated. Bootstrapping based on 5,000 successful replicates.



**Table S17.** Logistic regression for anxiety symptoms among university students from Russia during the first wave of the COVID-19 pandemic

| Variable                            | Estimate | 95% <i>CI</i> |             | Standard Error | Odds Ratio | <i>z</i> | Wald Test      |           |          | BCa 95% <i>CI</i> |             |
|-------------------------------------|----------|---------------|-------------|----------------|------------|----------|----------------|-----------|----------|-------------------|-------------|
|                                     |          | Lower bound   | Upper bound |                |            |          | Wald Statistic | <i>df</i> | <i>p</i> | Lower bound       | Upper bound |
| Intercept                           | -2.755   | -3.765        | -1.745      | 0.515          | 0.064      | -5.345   | 28.569         | 1         | < .001   | -3.768            | -1.589      |
| Gender (Women)                      | 0.565    | -0.044        | 1.174       | 0.311          | 1.760      | 1.819    | 3.308          | 1         | 0.069    | -0.092            | 1.173       |
| Place of Residence (City)           | 0.091    | -0.493        | 0.676       | 0.298          | 1.096      | 0.306    | 0.094          | 1         | 0.759    | -0.572            | 0.718       |
| Level of Study (Master)             | 0.707    | -0.066        | 1.481       | 0.395          | 2.029      | 1.792    | 3.201          | 1         | 0.073    | -0.195            | 1.539       |
| Exposure to COVID-19 (High)         | 0.672    | -0.01         | 1.354       | 0.348          | 1.958      | 1.931    | 3.727          | 1         | 0.054    | -0.081            | 1.368       |
| PIC Total (High)                    | -0.831   | -1.737        | 0.075       | 0.462          | 0.436      | -1.798   | 3.233          | 1         | 0.072    | -1.853            | 0.194       |
| PIC Qualifications (High)           | 0.781    | 0.059         | 1.503       | 0.368          | 2.183      | 2.119    | 4.491          | 1         | 0.034    | -0.032            | 1.500       |
| PIC Economic Status (High)          | 0.308    | -0.367        | 0.982       | 0.344          | 1.361      | 0.895    | 0.801          | 1         | 0.371    | -0.435            | 0.985       |
| PIC Relationships (High)            | 1.145    | 0.446         | 1.843       | 0.356          | 3.141      | 3.213    | 10.321         | 1         | 0.001    | 0.318             | 1.973       |
| Physical Activity (Insufficient)    | -0.109   | -0.686        | 0.468       | 0.294          | 0.897      | -0.371   | 0.138          | 1         | 0.711    | -0.756            | 0.503       |
| Physical Health (Worse)             | 0.508    | -0.314        | 1.330       | 0.419          | 1.662      | 1.211    | 1.466          | 1         | 0.226    | -0.450            | 1.444       |
| Physical Health Comparative (Worse) | 0.529    | -0.232        | 1.290       | 0.388          | 1.698      | 1.364    | 1.859          | 1         | 0.173    | -0.279            | 1.430       |

*Note.* *CI* = confidence interval; BCa = Bias-corrected accelerated. Bootstrapping based on 5,000 successful replicates.

**Table S18.** Logistic regression for anxiety symptoms among university students from Slovenia during the first wave of the COVID-19 pandemic

| Variable                            | Estimate | 95% <i>CI</i> |             | Standard Error | Odds Ratio | <i>z</i> | Wald Test      |           |          | BCa 95% <i>CI</i> |             |
|-------------------------------------|----------|---------------|-------------|----------------|------------|----------|----------------|-----------|----------|-------------------|-------------|
|                                     |          | Lower bound   | Upper bound |                |            |          | Wald Statistic | <i>df</i> | <i>p</i> | Lower bound       | Upper bound |
| Intercept                           | -3.179   | -4.669        | -1.689      | 0.76           | 0.042      | -4.182   | 17.493         | 1         | < .001   | -4.758            | -1.337      |
| Gender (Women)                      | 0.462    | -0.687        | 1.611       | 0.586          | 1.587      | 0.788    | 0.620          | 1         | 0.431    | -0.94             | 1.753       |
| Place of Residence (City)           | -0.497   | -1.35         | 0.356       | 0.435          | 0.608      | -1.143   | 1.306          | 1         | 0.253    | -1.527            | 0.487       |
| Level of Study (Master)             | -0.474   | -1.318        | 0.370       | 0.431          | 0.623      | -1.101   | 1.212          | 1         | 0.271    | -1.388            | 0.558       |
| Exposure to COVID-19 (High)         | 0.754    | -0.127        | 1.636       | 0.450          | 2.126      | 1.677    | 2.812          | 1         | 0.094    | -0.262            | 1.676       |
| PIC Total (High)                    | 0.968    | -0.215        | 2.151       | 0.604          | 2.633      | 1.604    | 2.573          | 1         | 0.109    | -0.551            | 2.351       |
| PIC Qualifications (High)           | 0.865    | -0.063        | 1.792       | 0.473          | 2.374      | 1.828    | 3.341          | 1         | 0.068    | -0.357            | 1.872       |
| PIC Economic Status (High)          | -0.288   | -1.191        | 0.616       | 0.461          | 0.750      | -0.624   | 0.390          | 1         | 0.533    | -1.325            | 0.744       |
| PIC Relationships (High)            | 0.363    | -0.569        | 1.295       | 0.476          | 1.437      | 0.762    | 0.581          | 1         | 0.446    | -0.821            | 1.405       |
| Physical Activity (Insufficient)    | 0.465    | -0.306        | 1.235       | 0.393          | 1.592      | 1.183    | 1.398          | 1         | 0.237    | -0.415            | 1.300       |
| Physical Health (Worse)             | 0.598    | -0.723        | 1.919       | 0.674          | 1.818      | 0.887    | 0.786          | 1         | 0.375    | -0.941            | 1.927       |
| Physical Health Comparative (Worse) | 1.005    | -0.110        | 2.119       | 0.569          | 2.731      | 1.767    | 3.123          | 1         | 0.077    | -0.187            | 2.088       |

*Note.* *CI* = confidence interval; BCa = Bias-corrected accelerated. Bootstrapping based on 5,000 successful replicates.

**Table S19.** Logistic regression for anxiety symptoms among university students from Turkey during the first wave of the COVID-19 pandemic

| Variable                            | Estimate | 95% <i>CI</i> |             | Standard Error | Odds Ratio | <i>z</i> | Wald Test      |           |          | BCa 95% <i>CI</i> |             |
|-------------------------------------|----------|---------------|-------------|----------------|------------|----------|----------------|-----------|----------|-------------------|-------------|
|                                     |          | Lower bound   | Upper bound |                |            |          | Wald Statistic | <i>df</i> | <i>p</i> | Lower bound       | Upper bound |
| Intercept                           | -1.891   | -3.021        | -0.762      | 0.576          | 0.151      | -3.283   | 10.776         | 1         | 0.001    | -2.967            | -0.717      |
| Gender (Women)                      | 0.656    | 0.162         | 1.151       | 0.252          | 1.928      | 2.602    | 6.771          | 1         | 0.009    | 0.111             | 1.175       |
| Place of Residence (City)           | -0.10    | -0.647        | 0.447       | 0.279          | 0.905      | -0.358   | 0.128          | 1         | 0.720    | -0.685            | 0.471       |
| Level of Study (Master)             | -0.171   | -1.036        | 0.693       | 0.441          | 0.842      | -0.389   | 0.151          | 1         | 0.697    | -1.071            | 0.745       |
| Exposure to COVID-19 (High)         | 0.676    | 0.032         | 1.319       | 0.328          | 1.965      | 2.058    | 4.236          | 1         | 0.040    | -0.007            | 1.309       |
| PIC Total (High)                    | 0.178    | -0.697        | 1.053       | 0.446          | 1.195      | 0.399    | 0.159          | 1         | 0.690    | -0.827            | 1.120       |
| PIC Qualifications (High)           | 0.217    | -0.416        | 0.850       | 0.323          | 1.242      | 0.671    | 0.451          | 1         | 0.502    | -0.507            | 0.929       |
| PIC Economic Status (High)          | 0.551    | -0.044        | 1.146       | 0.304          | 1.734      | 1.813    | 3.289          | 1         | 0.070    | -0.092            | 1.199       |
| PIC Relationships (High)            | 0.472    | -0.409        | 1.352       | 0.449          | 1.603      | 1.050    | 1.103          | 1         | 0.294    | -0.491            | 1.356       |
| Physical Activity (Insufficient)    | -0.357   | -1.051        | 0.338       | 0.354          | 0.700      | -1.006   | 1.013          | 1         | 0.314    | -1.085            | 0.409       |
| Physical Health (Worse)             | 0.746    | -0.286        | 1.778       | 0.527          | 2.108      | 1.416    | 2.006          | 1         | 0.157    | -0.689            | 1.976       |
| Physical Health Comparative (Worse) | 0.427    | -0.670        | 1.524       | 0.560          | 1.532      | 0.762    | 0.581          | 1         | 0.446    | -1.013            | 1.721       |

*Note.* *CI* = confidence interval; BCa = Bias-corrected accelerated. Bootstrapping based on 5,000 successful replicates.

**Table S20.** Logistic regression for anxiety symptoms among university students from Ukraine during the first wave of the COVID-19 pandemic

| Variable                            | Estimate | 95% <i>CI</i> |             | Standard Error | Odds Ratio | <i>z</i> | Wald Test      |           |          | BCa 95% <i>CI</i> |             |
|-------------------------------------|----------|---------------|-------------|----------------|------------|----------|----------------|-----------|----------|-------------------|-------------|
|                                     |          | Lower bound   | Upper bound |                |            |          | Wald Statistic | <i>df</i> | <i>p</i> | Lower bound       | Upper bound |
| Intercept                           | -3.868   | -5.202        | -2.533      | 0.681          | 0.021      | -5.682   | 32.281         | 1         | < .001   | -5.517            | -2.140      |
| Gender (Women)                      | 0.876    | 0.148         | 1.603       | 0.371          | 2.400      | 2.360    | 5.571          | 1         | 0.018    | 0.101             | 1.639       |
| Place of Residence (City)           | -0.166   | -0.847        | 0.515       | 0.348          | 0.847      | -0.477   | 0.228          | 1         | 0.633    | -0.923            | 0.560       |
| Level of Study (Master)             | -0.058   | -1.495        | 1.379       | 0.733          | 0.944      | -0.079   | 0.006          | 1         | 0.937    | -14.561           | 1.471       |
| Exposure to COVID-19 (High)         | 1.162    | 0.140         | 2.184       | 0.521          | 3.196      | 2.229    | 4.967          | 1         | 0.026    | 0.000             | 2.460       |
| PIC Total (High)                    | 0.341    | -0.585        | 1.267       | 0.472          | 1.407      | 0.722    | 0.522          | 1         | 0.470    | -0.599            | 1.337       |
| PIC Qualifications (High)           | 0.633    | -0.153        | 1.419       | 0.401          | 1.883      | 1.578    | 2.490          | 1         | 0.115    | -0.208            | 1.365       |
| PIC Economic Status (High)          | 0.140    | -0.558        | 0.839       | 0.357          | 1.151      | 0.393    | 0.155          | 1         | 0.694    | -0.610            | 0.900       |
| PIC Relationships (High)            | 0.815    | 0.037         | 1.593       | 0.397          | 2.258      | 2.052    | 4.212          | 1         | 0.040    | -0.132            | 1.745       |
| Physical Activity (Insufficient)    | -0.57    | -1.179        | 0.039       | 0.311          | 0.566      | -1.833   | 3.361          | 1         | 0.067    | -1.207            | 0.068       |
| Physical Health (Worse)             | 1.148    | -0.346        | 2.641       | 0.762          | 3.150      | 1.506    | 2.269          | 1         | 0.132    | -1.213            | 2.939       |
| Physical Health Comparative (Worse) | 0.291    | -1.156        | 1.739       | 0.739          | 1.338      | 0.394    | 0.156          | 1         | 0.693    | -1.825            | 2.064       |

*Note.* *CI* = confidence interval; BCa = Bias-corrected accelerated. Bootstrapping based on 5,000 successful replicates.
